# Supplementary material
Source: MDPI journal article supplement (https://www.mdpi.com/2076-3298/6/11/116)
Supplement: s1 [file s1]

**Table S1.** Literature Overview.

| a/a | Authors                                | Location                                            | Characteristics of Study Area                                                                                                                              | Applied Methods                                                                                                                                                             |
|-----|----------------------------------------|-----------------------------------------------------|------------------------------------------------------------------------------------------------------------------------------------------------------------|-----------------------------------------------------------------------------------------------------------------------------------------------------------------------------|
| 1   | Doerfingher & Zwahlen (1999)           | Switzerland,<br>St. Imier Spring,<br>Bern           | Area: 110 km <sup>2</sup><br>Malm limestone, 200–400 m<br>Main pollutant: liquid manure                                                                    | First application of EPIK method with the aim of new delineation of protection zones and re-establishment of groundwater protection areas in the St. Imier water catchment. |
| 2   | Gogu & Dassargues (2000)               | Belgium,<br>Beauraing                               | Area: 2,5 km <sup>2</sup><br>Karstified limestone<br>Unconfined aquifer, water table 18 m–40 m<br>Epikarst medium - poor degree of karstification          | Statistical sensitivity analysis and application of EPIK method have shown differences between effective weights and theoretical weights of the parameter weightings.       |
| 3   | Gogu, Hallet, Dassargues (2003)        | Belgium,<br>Neblon River Basin                      | Area: 65 km <sup>2</sup><br>Limestone<br>Main land use is agriculture and forests, villages are present in the study area<br>High degree of karstification | Application of EPIK, DRASTIC, GOD and ISIS method.                                                                                                                          |
| 4   | Neukum & Hötzel (2006)                 | Germany,<br>Karlsruhe,<br>Stuttgart                 | Area: 135 km <sup>2</sup><br>Limestones, Marls and Dolomites, 100 m<br>Well karstified aquifer, flow velocity 185 m/h                                      | Application of EPIK, DRASTIC, PI and GLA method                                                                                                                             |
| 5   | Ravbar & Goldscheider (2008)           | Slovenia, Catchment of<br>Podstenjsek spring        | Area: 9 km <sup>2</sup><br>Carbonate Rock, Flysch<br>High water table fluctuations                                                                         | Application of EPIK, PI, COP and Slovene Approach                                                                                                                           |
| 6   | Polemio, Casarano, Limoni, (2008)      | Italy,<br>Murgia Aquifer,<br>Apulia                 | Area: 78.2 km <sup>2</sup><br>Large coastal karst aquifer, affected by seawater intrusion                                                                  | Application of EPIK, PI, COP, GOD, DRASTIC and SINTACS method                                                                                                               |
| 7   | Kazakis, Oikonomidis, Voudouris (2015) | Greece,<br>Anthemountas Basin                       | Area: 374 km <sup>2</sup><br>Three different aquifer types, porous, karstic and fissured rocks aquifer. Very well developed karst                          | The DRASTIC, EPIK, AVI, DRASTIC-FM method were applied for vulnerability and risk assessment.                                                                               |
| 8   | Hamdan et al. (2016)                   | Jordan,<br>Tanour and<br>Rasoun Spring              | Area: 36 km <sup>2</sup><br>Tanour springs and Rasoun springs are main water supply for domestic use in the area                                           | Application of EPIK, COP, PI, VULK method                                                                                                                                   |
| 9   | Baalousha (2016)                       | Quatar                                              | Study area consists of karst and no karstic formations                                                                                                     | Application of DRASTIC and EPIK method                                                                                                                                      |
| 10  | Lenhare & Filho (2018)                 | Brazil, Guapiara Plateau and<br>Paranapiacaba Range | Two test sides with differences in karst development. Highly vulnerable areas are already under consideration by the delineation of protection zones.      | Application of EPIK and KDI method                                                                                                                                          |
| 11  | Pereira et al. (2018)                  | Brazil,<br>São Miguel Watershed                     | Tropical karst region with high contamination of phosphorus, nitrate and cadmium due to agricultural, livestock and urban land use.                        | EPIK, PI, DKI and COP method have been applied.                                                                                                                             |
| 12  | Jakada et al. (2018)                   | China,<br>Yichang,<br>Hubei Province                | Area: 194 km <sup>2</sup><br>Dominant rock type: Limestone<br>Well developed karst system                                                                  | EPIK method has been applied.                                                                                                                                               |
| 13  | Moreno-Gómez (2018)                    | Mexiko,<br>Yucatán Karst                            | Area: 39.52 km <sup>2</sup><br>Dominant sediments: Limestone and Dolomites<br>Well developed karst with conduit system and sinkholes                       | EPIK, COP, PI, PaPriKa method have been applied.                                                                                                                            |
| 14  | Momejian et al. (2019)                 | Lebanon                                             | Three study areas;<br>Beirut (22 km <sup>2</sup> ), Jal el Dib (1.5 km <sup>2</sup> ), and Tripoli (11 km <sup>2</sup> )                                   | Application of three different models of EPIK with differences in the urbanization impact.                                                                                  |
| 15  | Younos, Schreiber, Kosič Ficco, (2019) | USA,<br>Big Ceek Basin, Arkansas                    | Batesville and Boone formations (sandstone and impermeable chert)<br>Mantled karst, highly karstified                                                      | EPIK, COP, PI, DRASTIC, European Approach and Slovene Approach have been applied with additional Hazard and Risk mapping.                                                   |
